# Supplementary material for: Development of a Rapid Reverse Transcription-Recombinase Polymerase Amplification Couple Nucleic Acid Lateral Flow Method for Detecting Porcine Epidemic Diarrhoea Virus
Source: MDPI journal article supplement (doi:10.3390/biology11071018), 2022-07-06
Supplement: s1 [file s1]

**BLAST**® >> **blastn suite** >> results for RID-BR8EG1T6013

Your search is limited to records that include: Porcine epidemic diarrhea virus (taxid:28295)

|               |                                                              |
|---------------|--------------------------------------------------------------|
| Job Title     | <a href="#">Probe ...</a>                                    |
| RID           | <a href="#">BR8EG1T6013</a> Search expires on 06-30 08:50 am |
| Program       | BLASTN                                                       |
| Database      | ref_viruses_rep_genomes                                      |
| Query ID      | lcl Query_28359                                              |
| Description   | <a href="#">Probe ...</a>                                    |
| Molecule type | dna                                                          |
| Query Length  | 48                                                           |

**Descriptions**

| Description                                                      | Scientific Name                                 | Max Score | Total Score | Query Cover | E value | Per. Ident | Acc. Len | Accession                   |
|------------------------------------------------------------------|-------------------------------------------------|-----------|-------------|-------------|---------|------------|----------|-----------------------------|
| <a href="#">Porcine epidemic diarrhea virus, complete genome</a> | <a href="#">Porcine epidemic diarrhea virus</a> | 84.2      | 84.2        | 100%        | 4e-20   | 97.96%     | 28033    | <a href="#">NC_003436.1</a> |

Graphic Summary

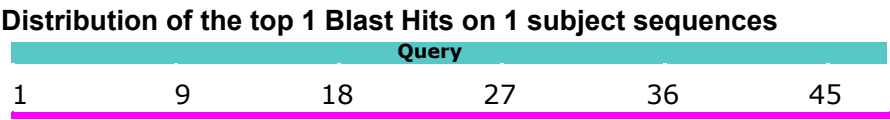

Alignments

Alignment view Pairwise ☐ CDS feature Restore defaults

Porcine epidemic diarrhea virus, complete genome  
Sequence ID: **NC\_003436.1** Length: 28033 Number of Matches: 1  
Range 1: 26232 to 26280

| Score         | Expect                                             | Identities | Gaps     | Strand    | Frame |
|---------------|----------------------------------------------------|------------|----------|-----------|-------|
| 84.2 bits(45) | 4e-20()                                            | 48/49(98%) | 1/49(2%) | Plus/Plus |       |
| Query 1       | GTCGTTTCAGTCAATGCTTCATCTGGCACT-GTTGGGCTTTCTATGTCCG |            |          |           | 48    |
| Sbjct 26232   | GTCGTTTCAGTCAATGCTTCATCTGGCACTGGTTGGGCTTTCTATGTCCG |            |          |           | 26280 |

Taxonomy

Reports

Lineage

| Organism                                        | Blast Name              | Score | Number of Hits | Description                                          |
|-------------------------------------------------|-------------------------|-------|----------------|------------------------------------------------------|
| <a href="#">Porcine epidemic diarrhea virus</a> | <a href="#">viruses</a> | 84.2  | 1              | <a href="#">Porcine epidemic diarrhea virus hits</a> |

Organism

| Description                                                      | Score | E value | Accession                 |
|------------------------------------------------------------------|-------|---------|---------------------------|
| Porcine epidemic diarrhea virus [viruses ]                       |       |         |                           |
| <a href="#">Porcine epidemic diarrhea virus, complete genome</a> | 84.2  | 4e-20   | <a href="#">NC_003436</a> |

Taxonomy

| Taxonomy                                        | Number of hits | Number of Organisms | Description                                          |
|-------------------------------------------------|----------------|---------------------|------------------------------------------------------|
| <a href="#">Porcine epidemic diarrhea virus</a> | 1              | 1                   | <a href="#">Porcine epidemic diarrhea virus hits</a> |
