# Supplementary material for: Development of a Rapid Reverse Transcription-Recombinase Polymerase Amplification Couple Nucleic Acid Lateral Flow Method for Detecting Porcine Epidemic Diarrhoea Virus
Source: MDPI journal article supplement (doi:10.3390/biology11071018), 2022-07-06
Supplement: s1 [file s1]

**Supplementary Data S1.** Reproducibility of the RPA-NALF assay.

| <b>Concentration of RNA<br/>standard (TCID<sub>50</sub>/mL)</b> | <b>Positive number<br/>(Intra-assay, n = 3)</b> | <b>Positive number<br/>(Inter-assay, n = 3)</b> |
|-----------------------------------------------------------------|-------------------------------------------------|-------------------------------------------------|
| 10 <sup>5</sup>                                                 | 3                                               | 3                                               |
| 10 <sup>4</sup>                                                 | 3                                               | 3                                               |
| 10 <sup>3</sup>                                                 | 3                                               | 3                                               |
| 10 <sup>2</sup>                                                 | 3                                               | 2                                               |
| 10 <sup>1</sup>                                                 | 2                                               | 1                                               |
| 10 <sup>0</sup>                                                 | 1                                               | 1                                               |
