# Supplementary material for: Development of a Rapid Reverse Transcription-Recombinase Polymerase Amplification Couple Nucleic Acid Lateral Flow Method for Detecting Porcine Epidemic Diarrhoea Virus
Source: MDPI journal article supplement (doi:10.3390/biology11071018), 2022-07-06
Supplement: s1 [file s1]

Your search is limited to records that include: Porcine epidemic diarrhea virus (taxid:28295)

|               |                                                              |
|---------------|--------------------------------------------------------------|
| Job Title     | <a href="#">R2 ...</a>                                       |
| RID           | <a href="#">BR89R9A1016</a> Search expires on 06-30 08:47 am |
| Program       | BLASTN                                                       |
| Database      | ref_viruses_rep_genomes                                      |
| Query ID      | lcl Query_4363                                               |
| Description   | <a href="#">R2 ...</a>                                       |
| Molecule type | dna                                                          |
| Query Length  | 31                                                           |

**Descriptions**

Descriptions

| Description                                                      | Scientific Name                                 | Max Score | Total Score | Query Cover | E value | Per. Ident | Acc. Len | Accession                   |
|------------------------------------------------------------------|-------------------------------------------------|-----------|-------------|-------------|---------|------------|----------|-----------------------------|
| <a href="#">Porcine epidemic diarrhea virus, complete genome</a> | <a href="#">Porcine epidemic diarrhea virus</a> | 58.4      | 58.4        | 100%        | 1e-12   | 100.00%    | 28033    | <a href="#">NC_003436.1</a> |

Graphic Summary

Distribution of the top 1 Blast Hits on 1 subject sequences

| Query |   |    |    |    |    |
|-------|---|----|----|----|----|
| 1     | 6 | 12 | 18 | 24 | 30 |

Alignments

Alignment view

Pairwise

☐ CDS feature

Restore defaults

Porcine epidemic diarrhea virus, complete genome  
Sequence ID: **NC\_003436.1** Length: 28033 Number of Matches: 1  
Range 1: 26188 to 26218

| Score         | Expect                      | Identities  | Gaps     | Strand     | Frame |
|---------------|-----------------------------|-------------|----------|------------|-------|
| 58.4 bits(31) | 1e-12()                     | 31/31(100%) | 0/31(0%) | Plus/Minus |       |
| Query 1       | GACAATTGTTGTAGTGGCCTTGGCGAC |             |          |            |       |
| Sbjct 26218   | GACAATTGTTGTAGTGGCCTTGGCGA  |             |          |            |       |

Taxonomy

Reports

Lineage

| Organism                                        | Blast Name              | Score | Number of Hits | Description                                          |
|-------------------------------------------------|-------------------------|-------|----------------|------------------------------------------------------|
| <a href="#">Porcine epidemic diarrhea virus</a> | <a href="#">viruses</a> | 58.4  | 1              | <a href="#">Porcine epidemic diarrhea virus hits</a> |

Organism

| Description                                                      | Score | E value | Accession                 |
|------------------------------------------------------------------|-------|---------|---------------------------|
| Porcine epidemic diarrhea virus [viruses ]                       |       |         |                           |
| <a href="#">Porcine epidemic diarrhea virus, complete genome</a> | 58.4  | 1e-12   | <a href="#">NC_003436</a> |

Taxonomy

| Taxonomy                                        | Number of hits | Number of Organisms | Description                                          |
|-------------------------------------------------|----------------|---------------------|------------------------------------------------------|
| <a href="#">Porcine epidemic diarrhea virus</a> | 1              | 1                   | <a href="#">Porcine epidemic diarrhea virus hits</a> |
