# Supplementary material for: Development of a Rapid Reverse Transcription-Recombinase Polymerase Amplification Couple Nucleic Acid Lateral Flow Method for Detecting Porcine Epidemic Diarrhoea Virus
Source: MDPI journal article supplement (doi:10.3390/biology11071018), 2022-07-06
Supplement: s1 [file s1]

**BLAST**<sup>®</sup> >> **blastn suite** >> results for RID-BR857EF1016

Your search is limited to records that include: Porcine epidemic diarrhea virus (taxid:28295)

|               |                                                              |
|---------------|--------------------------------------------------------------|
| Job Title     | <a href="#">F2 ...</a>                                       |
| RID           | <a href="#">BR857EF1016</a> Search expires on 06-30 08:45 am |
| Program       | BLASTN                                                       |
| Database      | ref_viruses_rep_genomes                                      |
| Query ID      | lcl Query_65179                                              |
| Description   | <a href="#">F2 ...</a>                                       |
| Molecule type | dna                                                          |
| Query Length  | 32                                                           |

**Descriptions**

Descriptions

| Description                                                      | Scientific Name                                 | Max Score | Total Score | Query Cover | E value | Per. Ident | Acc. Len | Accession                   |
|------------------------------------------------------------------|-------------------------------------------------|-----------|-------------|-------------|---------|------------|----------|-----------------------------|
| <a href="#">Porcine epidemic diarrhea virus, complete genome</a> | <a href="#">Porcine epidemic diarrhea virus</a> | 63.9      | 1037        | 100%        | 4e-14   | 100.00%    | 28033    | <a href="#">NC_003436.1</a> |

Graphic Summary

Distribution of the top 65 Blast Hits on 1 subject sequences

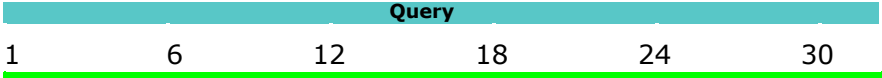

Alignments

Alignment view

Pairwise

☐ CDS feature

Restore defaults

Porcine epidemic diarrhea virus, complete genome  
Sequence ID: **NC\_003436.1** Length: 28033 Number of Matches: 65  
Range 1: 26049 to 26080

| Score         | Expect                       | Identities  | Gaps     | Strand    | Frame |
|---------------|------------------------------|-------------|----------|-----------|-------|
| 63.9 bits(32) | 4e-14()                      | 32/32(100%) | 0/32(0%) | Plus/Plus |       |
| Query 1       | CTGTGATGGGCCGACAGGTCTGCATTCC |             |          |           |       |
| Sbjct 26049   | CTGTGATGGGCCGACAGGTCTGCATTCC |             |          |           |       |

Range 2: 7086 to 7095

| Score         | Expect | Identities  | Gaps     | Strand    | Frame |
|---------------|--------|-------------|----------|-----------|-------|
| 20.3 bits(10) | 0.49() | 10/10(100%) | 0/10(0%) | Plus/Plus |       |
| Query 11      | CCGAC  |             |          |           |       |
| Sbjct 7086    | CCGAC  |             |          |           |       |

Range 3: 7430 to 7438

| Score        | Expect | Identities | Gaps    | Strand     | Frame |
|--------------|--------|------------|---------|------------|-------|
| 18.3 bits(9) | 2.0()  | 9/9(100%)  | 0/9(0%) | Plus/Minus |       |
| Query 13     | GACA   |            |         |            |       |
| Sbjct 7438   | GACA   |            |         |            |       |

Range 4: 18418 to 18426

| Score        | Expect | Identities | Gaps    | Strand    | Frame |
|--------------|--------|------------|---------|-----------|-------|
| 18.3 bits(9) | 2.0()  | 9/9(100%)  | 0/9(0%) | Plus/Plus |       |
| Query 21     | TGCA   |            |         |           |       |
| Sbjct 1841   | TGCA   |            |         |           |       |

Range 5: 19917 to 19925

| Score        | Expect | Identities | Gaps    | Strand     | Frame |
|--------------|--------|------------|---------|------------|-------|
| 18.3 bits(9) | 2.0()  | 9/9(100%)  | 0/9(0%) | Plus/Minus |       |
| Query 2      | TGTGA  |            |         |            |       |
| Sbjct 1992   | TGTGA  |            |         |            |       |

Range 6: 20147 to 20155

| Score        | Expect | Identities | Gaps    | Strand    | Frame |
|--------------|--------|------------|---------|-----------|-------|
| 18.3 bits(9) | 2.0()  | 9/9(100%)  | 0/9(0%) | Plus/Plus |       |
| Query 2      | TGTGA  |            |         |           |       |
| Sbjct 2014   |        |            |         |           |       |

Range 7: 26528 to 26536

| Score        | Expect | Identities | Gaps    | Strand     | Frame |
|--------------|--------|------------|---------|------------|-------|
| 18.3 bits(9) | 2.0()  | 9/9(100%)  | 0/9(0%) | Plus/Minus |       |
| Query 23     | CATT   |            |         |            |       |
| Sbjct 2653   |        |            |         |            |       |

Range 8: 2341 to 2348

| Score        | Expect | Identities | Gaps    | Strand     | Frame |
|--------------|--------|------------|---------|------------|-------|
| 16.4 bits(8) | 7.7()  | 8/8(100%)  | 0/8(0%) | Plus/Minus |       |
| Query 6      | ATGG   |            |         |            |       |
| Sbjct 234    |        |            |         |            |       |

Range 9: 5889 to 5896

| Score        | Expect | Identities | Gaps    | Strand     | Frame |
|--------------|--------|------------|---------|------------|-------|
| 16.4 bits(8) | 7.7()  | 8/8(100%)  | 0/8(0%) | Plus/Minus |       |
| Query 2      | TGT    |            |         |            |       |
| Sbjct 589    |        |            |         |            |       |

Range 10: 5951 to 5958

| Score        | Expect | Identities | Gaps    | Strand     | Frame |
|--------------|--------|------------|---------|------------|-------|
| 16.4 bits(8) | 7.7()  | 8/8(100%)  | 0/8(0%) | Plus/Minus |       |
| Query 9      | GGCC   |            |         |            |       |
| Sbjct 595    |        |            |         |            |       |

Range 11: 6455 to 6462

| Score        | Expect | Identities | Gaps    | Strand    | Frame |
|--------------|--------|------------|---------|-----------|-------|
| 16.4 bits(8) | 7.7()  | 8/8(100%)  | 0/8(0%) | Plus/Plus |       |
| Query 1      | CTG    |            |         |           |       |
| Sbjct 645    |        |            |         |           |       |

Range 12: 8544 to 8551

| Score        | Expect | Identities | Gaps    | Strand     | Frame |
|--------------|--------|------------|---------|------------|-------|
| 16.4 bits(8) | 7.7()  | 8/8(100%)  | 0/8(0%) | Plus/Minus |       |
| Query 19     | TCT    |            |         |            |       |
| Sbjct 855    |        |            |         |            |       |

Range 13: 13153 to 13160

| Score        | Expect | Identities | Gaps    | Strand    | Frame |
|--------------|--------|------------|---------|-----------|-------|
| 16.4 bits(8) | 7.7()  | 8/8(100%)  | 0/8(0%) | Plus/Plus |       |
| Query 1      | CTG    |            |         |           |       |

Sbjct 131 |||||

Range 14: 15613 to 15620

| Score        | Expect | Identities | Gaps    | Strand    | Frame |
|--------------|--------|------------|---------|-----------|-------|
| 16.4 bits(8) | 7.7()  | 8/8(100%)  | 0/8(0%) | Plus/Plus |       |
| Query 21     | TGC    |            |         |           |       |
| Sbjct 156    |        |            |         |           |       |

Range 15: 17070 to 17077

| Score        | Expect | Identities | Gaps    | Strand     | Frame |
|--------------|--------|------------|---------|------------|-------|
| 16.4 bits(8) | 7.7()  | 8/8(100%)  | 0/8(0%) | Plus/Minus |       |
| Query 2      | TGT    |            |         |            |       |
| Sbjct 170    |        |            |         |            |       |

Range 16: 17524 to 17531

| Score        | Expect | Identities | Gaps    | Strand     | Frame |
|--------------|--------|------------|---------|------------|-------|
| 16.4 bits(8) | 7.7()  | 8/8(100%)  | 0/8(0%) | Plus/Minus |       |
| Query 15     | CAG    |            |         |            |       |
| Sbjct 175    |        |            |         |            |       |

Range 17: 18042 to 18049

| Score        | Expect | Identities | Gaps    | Strand     | Frame |
|--------------|--------|------------|---------|------------|-------|
| 16.4 bits(8) | 7.7()  | 8/8(100%)  | 0/8(0%) | Plus/Minus |       |
| Query 2      | TGT    |            |         |            |       |
| Sbjct 180    |        |            |         |            |       |

Range 18: 21081 to 21088

| Score        | Expect | Identities | Gaps    | Strand    | Frame |
|--------------|--------|------------|---------|-----------|-------|
| 16.4 bits(8) | 7.7()  | 8/8(100%)  | 0/8(0%) | Plus/Plus |       |
| Query 23     | CAT    |            |         |           |       |
| Sbjct 210    |        |            |         |           |       |

Range 19: 25731 to 25738

| Score        | Expect | Identities | Gaps    | Strand     | Frame |
|--------------|--------|------------|---------|------------|-------|
| 16.4 bits(8) | 7.7()  | 8/8(100%)  | 0/8(0%) | Plus/Minus |       |
| Query 24     | ATT    |            |         |            |       |
| Sbjct 257    |        |            |         |            |       |

Range 20: 27503 to 27510

| Score        | Expect | Identities | Gaps    | Strand     | Frame |
|--------------|--------|------------|---------|------------|-------|
| 16.4 bits(8) | 7.7()  | 8/8(100%)  | 0/8(0%) | Plus/Minus |       |
| Query 21     | TGC    |            |         |            |       |
| Sbjct 275    |        |            |         |            |       |

Range 21: 27622 to 27629

| Score        | Expect | Identities | Gaps    | Strand     | Frame |
|--------------|--------|------------|---------|------------|-------|
| 16.4 bits(8) | 7.7()  | 8/8(100%)  | 0/8(0%) | Plus/Minus |       |
| Query 23     | CAT    |            |         |            |       |
| Sbjct 276    |        |            |         |            |       |

Range 22: 334 to 340

| Score        | Expect | Identities | Gaps    | Strand     | Frame |
|--------------|--------|------------|---------|------------|-------|
| 14.4 bits(7) | 30()   | 7/7(100%)  | 0/7(0%) | Plus/Minus |       |
| Query 19     | TC     |            |         |            |       |
| Sbjct 340    |        |            |         |            |       |

Range 23: 1817 to 1823

| Score        | Expect | Identities | Gaps    | Strand     | Frame |
|--------------|--------|------------|---------|------------|-------|
| 14.4 bits(7) | 30()   | 7/7(100%)  | 0/7(0%) | Plus/Minus |       |
| Query 7      | TGG    |            |         |            |       |
| Sbjct 18     |        |            |         |            |       |

Range 24: 1824 to 1830

| Score        | Expect | Identities | Gaps    | Strand    | Frame |
|--------------|--------|------------|---------|-----------|-------|
| 14.4 bits(7) | 30()   | 7/7(100%)  | 0/7(0%) | Plus/Plus |       |
| Query 12     | CG     |            |         |           |       |
| Sbjct 18     |        |            |         |           |       |

Range 25: 1985 to 1991

| Score        | Expect | Identities | Gaps    | Strand    | Frame |
|--------------|--------|------------|---------|-----------|-------|
| 14.4 bits(7) | 30()   | 7/7(100%)  | 0/7(0%) | Plus/Plus |       |
| Query 21     | TG     |            |         |           |       |
| Sbjct 19     |        |            |         |           |       |

Range 26: 3715 to 3721

| Score        | Expect | Identities | Gaps    | Strand     | Frame |
|--------------|--------|------------|---------|------------|-------|
| 14.4 bits(7) | 30()   | 7/7(100%)  | 0/7(0%) | Plus/Minus |       |
| Query 10     | GC     |            |         |            |       |
| Sbjct 37     |        |            |         |            |       |

Range 27: 5539 to 5545

| Score        | Expect | Identities | Gaps    | Strand    | Frame |
|--------------|--------|------------|---------|-----------|-------|
| 14.4 bits(7) | 30()   | 7/7(100%)  | 0/7(0%) | Plus/Plus |       |
| Query 15     | CA     |            |         |           |       |
| Sbjct 55     |        |            |         |           |       |

Range 28: 6529 to 6535

| Score        | Expect | Identities | Gaps    | Strand    | Frame |
|--------------|--------|------------|---------|-----------|-------|
| 14.4 bits(7) | 30()   | 7/7(100%)  | 0/7(0%) | Plus/Plus |       |
| Query 16     | AG     |            |         |           |       |
| Sbjct 65     |        |            |         |           |       |

Range 29: 6617 to 6623

| Score        | Expect | Identities | Gaps    | Strand    | Frame |
|--------------|--------|------------|---------|-----------|-------|
| 14.4 bits(7) | 30()   | 7/7(100%)  | 0/7(0%) | Plus/Plus |       |
| Query 2      | TG     |            |         |           |       |
| Sbjct 66     |        |            |         |           |       |

Range 30: 6696 to 6702

| Score        | Expect | Identities | Gaps    | Strand    | Frame |
|--------------|--------|------------|---------|-----------|-------|
| 14.4 bits(7) | 30()   | 7/7(100%)  | 0/7(0%) | Plus/Plus |       |
| Query 25     | TT     |            |         |           |       |
| Sbjct 66     |        |            |         |           |       |

Range 31: 7236 to 7242

| Score        | Expect | Identities | Gaps    | Strand     | Frame |
|--------------|--------|------------|---------|------------|-------|
| 14.4 bits(7) | 30()   | 7/7(100%)  | 0/7(0%) | Plus/Minus |       |
| Query 1      | CT     |            |         |            |       |
| Sbjct 72     |        |            |         |            |       |

Range 32: 7289 to 7295

| Score        | Expect | Identities | Gaps    | Strand     | Frame |
|--------------|--------|------------|---------|------------|-------|
| 14.4 bits(7) | 30()   | 7/7(100%)  | 0/7(0%) | Plus/Minus |       |
| Query 21     | TG     |            |         |            |       |
| Sbjct 72     |        |            |         |            |       |

Range 33: 7846 to 7852

| Score        | Expect | Identities | Gaps    | Strand    | Frame |
|--------------|--------|------------|---------|-----------|-------|
| 14.4 bits(7) | 30()   | 7/7(100%)  | 0/7(0%) | Plus/Plus |       |
| Query 15     | CA     |            |         |           |       |
| Sbjct 78     |        |            |         |           |       |

Range 34: 8498 to 8504

| Score        | Expect | Identities | Gaps    | Strand    | Frame |
|--------------|--------|------------|---------|-----------|-------|
| 14.4 bits(7) | 30()   | 7/7(100%)  | 0/7(0%) | Plus/Plus |       |
| Query 18     | GT     |            |         |           |       |
| Sbjct 84     |        |            |         |           |       |

Range 35: 8755 to 8761

| Score        | Expect | Identities | Gaps    | Strand     | Frame |
|--------------|--------|------------|---------|------------|-------|
| 14.4 bits(7) | 30()   | 7/7(100%)  | 0/7(0%) | Plus/Minus |       |
| Query 11     | CC     |            |         |            |       |
| Sbjct 87     |        |            |         |            |       |

Range 36: 9966 to 9972

| Score | Expect | Identities | Gaps | Strand | Frame |
|-------|--------|------------|------|--------|-------|
|-------|--------|------------|------|--------|-------|

14.4 bits(7)            30()            7/7(100%)            0/7(0%)            Plus/Plus

Query 13            GA  
Sbjct 99            |||||||

Range 37: 10088 to 10094

| Score        | Expect | Identities | Gaps    | Strand    | Frame |
|--------------|--------|------------|---------|-----------|-------|
| 14.4 bits(7) | 30()   | 7/7(100%)  | 0/7(0%) | Plus/Plus |       |
| Query 19     | TC     |            |         |           |       |
| Sbjct 10     |        |            |         |           |       |

Range 38: 10386 to 10392

| Score        | Expect | Identities | Gaps    | Strand    | Frame |
|--------------|--------|------------|---------|-----------|-------|
| 14.4 bits(7) | 30()   | 7/7(100%)  | 0/7(0%) | Plus/Plus |       |
| Query 15     | CA     |            |         |           |       |
| Sbjct 10     |        |            |         |           |       |

Range 39: 10950 to 10956

| Score        | Expect | Identities | Gaps    | Strand     | Frame |
|--------------|--------|------------|---------|------------|-------|
| 14.4 bits(7) | 30()   | 7/7(100%)  | 0/7(0%) | Plus/Minus |       |
| Query 25     | TT     |            |         |            |       |
| Sbjct 10     |        |            |         |            |       |

Range 40: 11542 to 11548

| Score        | Expect | Identities | Gaps    | Strand    | Frame |
|--------------|--------|------------|---------|-----------|-------|
| 14.4 bits(7) | 30()   | 7/7(100%)  | 0/7(0%) | Plus/Plus |       |
| Query 21     | TG     |            |         |           |       |
| Sbjct 11     |        |            |         |           |       |

Range 41: 12459 to 12465

| Score        | Expect | Identities | Gaps    | Strand     | Frame |
|--------------|--------|------------|---------|------------|-------|
| 14.4 bits(7) | 30()   | 7/7(100%)  | 0/7(0%) | Plus/Minus |       |
| Query 18     | GT     |            |         |            |       |
| Sbjct 12     |        |            |         |            |       |

Range 42: 12778 to 12784

| Score        | Expect | Identities | Gaps    | Strand    | Frame |
|--------------|--------|------------|---------|-----------|-------|
| 14.4 bits(7) | 30()   | 7/7(100%)  | 0/7(0%) | Plus/Plus |       |
| Query 21     | TG     |            |         |           |       |
| Sbjct 12     |        |            |         |           |       |

Range 43: 13391 to 13397

| Score        | Expect | Identities | Gaps    | Strand     | Frame |
|--------------|--------|------------|---------|------------|-------|
| 14.4 bits(7) | 30()   | 7/7(100%)  | 0/7(0%) | Plus/Minus |       |
| Query 24     | AT     |            |         |            |       |
| Sbjct 13     |        |            |         |            |       |

Range 44: 15032 to 15038

| Score        | Expect | Identities | Gaps    | Strand     | Frame |
|--------------|--------|------------|---------|------------|-------|
| 14.4 bits(7) | 30()   | 7/7(100%)  | 0/7(0%) | Plus/Minus |       |
| Query 19     | TC     |            |         |            |       |
| Sbjct 15     |        |            |         |            |       |

Range 45: 15507 to 15513

| Score        | Expect | Identities | Gaps    | Strand     | Frame |
|--------------|--------|------------|---------|------------|-------|
| 14.4 bits(7) | 30()   | 7/7(100%)  | 0/7(0%) | Plus/Minus |       |
| Query 3      | GT     |            |         |            |       |
| Sbjct 15     |        |            |         |            |       |

Range 46: 15885 to 15891

| Score        | Expect | Identities | Gaps    | Strand     | Frame |
|--------------|--------|------------|---------|------------|-------|
| 14.4 bits(7) | 30()   | 7/7(100%)  | 0/7(0%) | Plus/Minus |       |
| Query 17     | GG     |            |         |            |       |
| Sbjct 15     |        |            |         |            |       |

Range 47: 18280 to 18286

| Score        | Expect | Identities | Gaps    | Strand    | Frame |
|--------------|--------|------------|---------|-----------|-------|
| 14.4 bits(7) | 30()   | 7/7(100%)  | 0/7(0%) | Plus/Plus |       |
| Query 4      | TGA    |            |         |           |       |
| Sbjct 18     |        |            |         |           |       |

Range 48: 18550 to 18556

| Score        | Expect | Identities | Gaps    | Strand    | Frame |
|--------------|--------|------------|---------|-----------|-------|
| 14.4 bits(7) | 30()   | 7/7(100%)  | 0/7(0%) | Plus/Plus |       |
| Query 20     | CT     |            |         |           |       |
| Sbjct 18     |        |            |         |           |       |

Range 49: 20001 to 20007

| Score        | Expect | Identities | Gaps    | Strand     | Frame |
|--------------|--------|------------|---------|------------|-------|
| 14.4 bits(7) | 30()   | 7/7(100%)  | 0/7(0%) | Plus/Minus |       |
| Query 26     | TC     |            |         |            |       |
| Sbjct 20     |        |            |         |            |       |

Range 50: 20088 to 20094

| Score        | Expect | Identities | Gaps    | Strand     | Frame |
|--------------|--------|------------|---------|------------|-------|
| 14.4 bits(7) | 30()   | 7/7(100%)  | 0/7(0%) | Plus/Minus |       |
| Query 13     | GA     |            |         |            |       |
| Sbjct 20     |        |            |         |            |       |

Range 51: 20388 to 20394

| Score        | Expect | Identities | Gaps    | Strand    | Frame |
|--------------|--------|------------|---------|-----------|-------|
| 14.4 bits(7) | 30()   | 7/7(100%)  | 0/7(0%) | Plus/Plus |       |
| Query 1      |        |            |         |           |       |



Sbjct 20 |||||

Range 52: 21052 to 21058

| Score        | Expect | Identities | Gaps    | Strand    | Frame |
|--------------|--------|------------|---------|-----------|-------|
| 14.4 bits(7) | 30()   | 7/7(100%)  | 0/7(0%) | Plus/Plus |       |
| Query 14     | AC     |            |         |           |       |
| Sbjct 21     |        |            |         |           |       |

Range 53: 21098 to 21104

| Score        | Expect | Identities | Gaps    | Strand    | Frame |
|--------------|--------|------------|---------|-----------|-------|
| 14.4 bits(7) | 30()   | 7/7(100%)  | 0/7(0%) | Plus/Plus |       |
| Query 3      | GT     |            |         |           |       |
| Sbjct 21     |        |            |         |           |       |

Range 54: 21117 to 21123

| Score        | Expect | Identities | Gaps    | Strand     | Frame |
|--------------|--------|------------|---------|------------|-------|
| 14.4 bits(7) | 30()   | 7/7(100%)  | 0/7(0%) | Plus/Minus |       |
| Query 10     | GC     |            |         |            |       |
| Sbjct 21     |        |            |         |            |       |

Range 55: 22018 to 22024

| Score        | Expect | Identities | Gaps    | Strand    | Frame |
|--------------|--------|------------|---------|-----------|-------|
| 14.4 bits(7) | 30()   | 7/7(100%)  | 0/7(0%) | Plus/Plus |       |
| Query 2      | TG     |            |         |           |       |
| Sbjct 22     |        |            |         |           |       |

Range 56: 22326 to 22332

| Score        | Expect | Identities | Gaps    | Strand     | Frame |
|--------------|--------|------------|---------|------------|-------|
| 14.4 bits(7) | 30()   | 7/7(100%)  | 0/7(0%) | Plus/Minus |       |
| Query 1      | CT     |            |         |            |       |
| Sbjct 22     |        |            |         |            |       |

Range 57: 22373 to 22379

| Score        | Expect | Identities | Gaps    | Strand     | Frame |
|--------------|--------|------------|---------|------------|-------|
| 14.4 bits(7) | 30()   | 7/7(100%)  | 0/7(0%) | Plus/Minus |       |
| Query 13     | GA     |            |         |            |       |
| Sbjct 22     |        |            |         |            |       |

Range 58: 22540 to 22546

| Score        | Expect | Identities | Gaps    | Strand     | Frame |
|--------------|--------|------------|---------|------------|-------|
| 14.4 bits(7) | 30()   | 7/7(100%)  | 0/7(0%) | Plus/Minus |       |
| Query 1      | CT     |            |         |            |       |
| Sbjct 22     |        |            |         |            |       |

Range 59: 23234 to 23240

| Score        | Expect | Identities | Gaps    | Strand    | Frame |
|--------------|--------|------------|---------|-----------|-------|
| 14.4 bits(7) | 30()   | 7/7(100%)  | 0/7(0%) | Plus/Plus |       |
| Query 3      | GT     |            |         |           |       |
| Sbjct 23     |        |            |         |           |       |

Range 60: 23308 to 23314

| Score        | Expect | Identities | Gaps    | Strand    | Frame |
|--------------|--------|------------|---------|-----------|-------|
| 14.4 bits(7) | 30()   | 7/7(100%)  | 0/7(0%) | Plus/Plus |       |
| Query 16     | AG     |            |         |           |       |
| Sbjct 23     |        |            |         |           |       |

Range 61: 24032 to 24038

| Score        | Expect | Identities | Gaps    | Strand    | Frame |
|--------------|--------|------------|---------|-----------|-------|
| 14.4 bits(7) | 30()   | 7/7(100%)  | 0/7(0%) | Plus/Plus |       |
| Query 3      | GT     |            |         |           |       |
| Sbjct 24     |        |            |         |           |       |

Range 62: 24672 to 24678

| Score        | Expect | Identities | Gaps    | Strand    | Frame |
|--------------|--------|------------|---------|-----------|-------|
| 14.4 bits(7) | 30()   | 7/7(100%)  | 0/7(0%) | Plus/Plus |       |
| Query 20     | CT     |            |         |           |       |
| Sbjct 24     |        |            |         |           |       |

Range 63: 25414 to 25420

| Score        | Expect | Identities | Gaps    | Strand    | Frame |
|--------------|--------|------------|---------|-----------|-------|
| 14.4 bits(7) | 30()   | 7/7(100%)  | 0/7(0%) | Plus/Plus |       |
| Query 20     | CT     |            |         |           |       |
| Sbjct 25     |        |            |         |           |       |

Range 64: 26733 to 26739

| Score        | Expect | Identities | Gaps    | Strand    | Frame |
|--------------|--------|------------|---------|-----------|-------|
| 14.4 bits(7) | 30()   | 7/7(100%)  | 0/7(0%) | Plus/Plus |       |
| Query 23     | CA     |            |         |           |       |
| Sbjct 26     |        |            |         |           |       |

Range 65: 28006 to 28012

| Score        | Expect | Identities | Gaps    | Strand     | Frame |
|--------------|--------|------------|---------|------------|-------|
| 14.4 bits(7) | 30()   | 7/7(100%)  | 0/7(0%) | Plus/Minus |       |
| Query 15     | CA     |            |         |            |       |
| Sbjct 28     |        |            |         |            |       |

| Organism                                        | Blast Name              | Score | Number of Hits | Description                                        |
|-------------------------------------------------|-------------------------|-------|----------------|----------------------------------------------------|
| <a href="#">Porcine epidemic diarrhea virus</a> | <a href="#">viruses</a> | 63.9  | <u>1</u>       | <b><u>Porcine epidemic diarrhea virus hits</u></b> |

Organism

| Description                                                    | Score | E value | Accession                 |
|----------------------------------------------------------------|-------|---------|---------------------------|
| Porcine epidemic diarrhea virus [viruses ]                     |       |         |                           |
| <b><u>Porcine epidemic diarrhea virus, complete genome</u></b> | 63.9  | 4e-14   | <a href="#">NC_003436</a> |

Taxonomy

| Taxonomy                                        | Number of hits | Number of Organisms | Description                                        |
|-------------------------------------------------|----------------|---------------------|----------------------------------------------------|
| <a href="#">Porcine epidemic diarrhea virus</a> | <u>1</u>       | <u>1</u>            | <b><u>Porcine epidemic diarrhea virus hits</u></b> |
