# Supplementary figures and images for: Development of a Rapid Reverse Transcription-Recombinase Polymerase Amplification Couple Nucleic Acid Lateral Flow Method for Detecting Porcine Epidemic Diarrhoea Virus
Source: MDPI journal article supplement (doi:10.3390/biology11071018), 2022-07-06

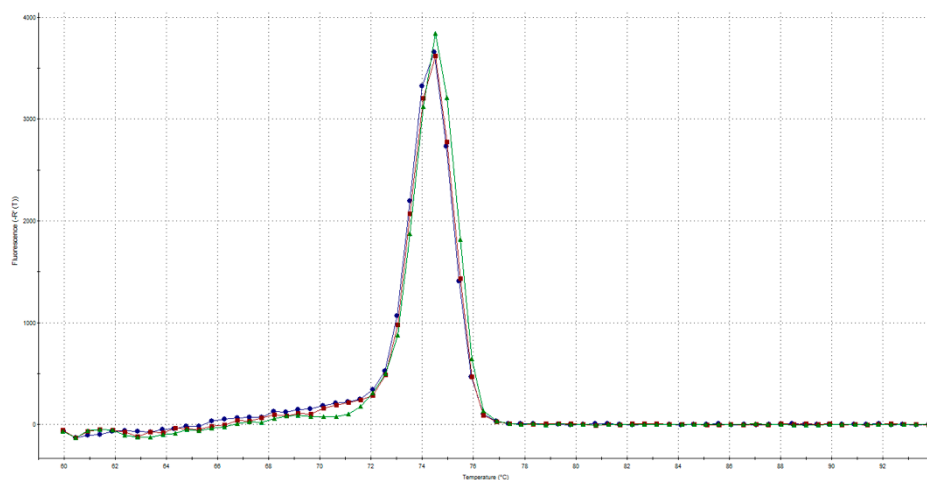

**Supplementary Data S2.** Melting curve analysis of M gene amplification by RT-qPCR.

Supplement: s1 [file s1]
